# Supplementary material for: Joint-GWAS, Linkage Mapping, and Transcriptome Analysis to Reveal the Genetic Basis of Plant Architecture-Related Traits in Maize
Source: MDPI journal article supplement (doi:10.3390/ijms25052694), 2024-02-26
Supplement: s1 [file s1]

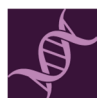

## Supplementary Materials

**Table S1.** Description of SNPs significantly associated with maize plant architecture

| Trait | Environment | SNP name               | Chromosome | Position  | -log10(P) | R2(%) |
|-------|-------------|------------------------|------------|-----------|-----------|-------|
| PH    | Zhangye     | SYN35346               | 1          | 2724801   | 4.70      | 11.25 |
|       |             | SYN6318                | 1          | 6206622   | 4.62      | 3.25  |
|       |             | PZE-101213253          | 1          | 262359150 | 5.93      | 1.75  |
|       |             | PZE-101160778          | 1          | 202855995 | 5.07      | 19.21 |
|       |             | PUT-163a-78122363-4402 | 1          | 284147312 | 4.48      | 1.66  |
|       |             | PZE-102133103          | 2          | 183597022 | 4.26      | 3.77  |
|       |             | PZE-102027520          | 2          | 12799478  | 5.09      | 3.33  |
|       |             | PZE-102121473          | 2          | 164391609 | 5.11      | 3.19  |
|       |             | PZE-103128516          | 3          | 183511214 | 6.99      | 10.63 |
|       |             | PZE-103057113          | 3          | 69933153  | 8.27      | 25.87 |
|       |             | SYN6704                | 3          | 214837865 | 6.52      | 10.73 |
|       |             | PZE-104112214          | 4          | 193127992 | 4.82      | 18.99 |
|       |             | PHM14235.14            | 4          | 3069054   | 5.66      | 3.68  |
|       |             | PZE-104004875          | 4          | 3547938   | 4.22      | 2.67  |
|       |             | SYN11697               | 4          | 9730261   | 5.87      | 8.25  |
|       |             | ZM013874-0376          | 6          | 82077772  | 6.67      | 9.39  |
|       |             | SYN31213               | 7          | 109722314 | 5.46      | 4.03  |

|         |               |    |           |       |       |
|---------|---------------|----|-----------|-------|-------|
|         | PZE-108002410 | 8  | 2524458   | 7.07  | 5.54  |
|         | PZE-108040089 | 8  | 63389712  | 4.26  | 3.90  |
|         | PZE-109027579 | 9  | 27901818  | 13.08 | 11.55 |
|         | SYN26907      | 9  | 142982585 | 7.82  | 6.71  |
|         | SYN9733       | 10 | 81929828  | 6.23  | 4.50  |
|         | PZE-101192491 | 1  | 238400676 | 5.15  | 9.19  |
| Guiyang | ZM013346-0450 | 4  | 237683350 | 5.52  | 17.53 |
|         | PZE-106027247 | 6  | 64142485  | 5.95  | 11.93 |
|         | PZE-101102168 | 1  | 99207957  | 7.20  | 16.00 |
|         | PZE-101102244 | 1  | 99683790  | 9.27  | 15.77 |
|         | PZE-101198702 | 1  | 246065082 | 6.97  | 16.78 |
|         | SYN31829      | 1  | 262344483 | 5.45  | 6.06  |
|         | SYN434        | 1  | 288440329 | 7.77  | 12.98 |
|         | SYN19476      | 2  | 32319562  | 5.81  | 4.4   |
| Sanya   | SYN801        | 3  | 60244907  | 5.80  | 4.51  |
|         | SYN31292      | 3  | 163898354 | 8.68  | 10.55 |
|         | PZE-104025181 | 4  | 29205220  | 5.73  | 6.57  |
|         | PZE-104092741 | 4  | 167834280 | 5.52  | 13.5  |
|         | SYN5723       | 5  | 655460    | 5.51  | 6.5   |
|         | SYN37836      | 5  | 9865064   | 4.85  | 8.41  |
|         | PZE-106064449 | 6  | 116335450 | 7.2   | 16    |

|         |               |    |           |      |       |
|---------|---------------|----|-----------|------|-------|
| Zhangye | SYN28847      | 10 | 47067413  | 4.82 | 6.42  |
|         | PZE-110066900 | 10 | 123022997 | 4.96 | 5.93  |
|         | SYN20042      | 1  | 284052211 | 5.88 | 36.18 |
|         | SYN2041       | 1  | 84622747  | 3.80 | 2.93  |
|         | SYN14016      | 1  | 295083826 | 8.36 | 9.19  |
|         | PZE-101064527 | 1  | 47595480  | 5.51 | 6.33  |
|         | SYN16785      | 2  | 12097490  | 3.88 | 6.01  |
|         | PZE-102109004 | 2  | 140255184 | 4.07 | 8.04  |
|         | PZE-104051887 | 4  | 89327390  | 4.71 | 3.31  |
|         | SYN21465      | 4  | 184629742 | 7.24 | 11.60 |
| EH      | PZE-104050891 | 4  | 87110052  | 4.41 | 7.83  |
|         | PZE-105146867 | 5  | 198973141 | 3.85 | 3.51  |
|         | SYN34204      | 7  | 145631181 | 4.53 | 3.61  |
|         | PZE-107062095 | 7  | 112910593 | 4.53 | 6.84  |
|         | SYN20446      | 8  | 166991645 | 7.45 | 10.15 |
|         | PZE-108079155 | 8  | 133836445 | 3.97 | 3.23  |
|         | PZE-109060918 | 9  | 99719655  | 6.51 | 7.01  |
|         | PZE-110072208 | 10 | 128385969 | 5.39 | 5.51  |
|         | PZE-110040909 | 10 | 77905176  | 4.52 | 5.89  |
|         | PZE-110076169 | 10 | 131863026 | 3.79 | 8.96  |
| Guiyang | PZE-101198702 | 1  | 246065082 | 5.32 | 12.99 |

---

|       |                        |    |           |      |       |
|-------|------------------------|----|-----------|------|-------|
|       | PZE-101157937          | 1  | 199991908 | 4.76 | 4.21  |
|       | PZE-102097892          | 2  | 113905259 | 5.26 | 6.15  |
|       | SYN13768               | 3  | 27198816  | 4.54 | 4.61  |
|       | PUT-163a-78121249-4396 | 3  | 141912418 | 4.22 | 4.96  |
|       | PZE-104051841          | 4  | 89297959  | 6.84 | 5.51  |
|       | PZE-104067920          | 4  | 134117096 | 3.77 | 4.28  |
|       | PZE-105106149          | 5  | 160882618 | 5.45 | 5.40  |
|       | SYN27136               | 5  | 13993759  | 4.46 | 3.55  |
|       | PZE-105112344          | 5  | 168635990 | 3.92 | 1.65  |
|       | PZE-106027247          | 6  | 64142485  | 7.68 | 9.69  |
|       | PZE-107018058          | 7  | 15349014  | 4.24 | 2.65  |
|       | PZE-107041844          | 7  | 71317652  | 4.94 | 9.08  |
|       | SYN37324               | 9  | 1038593   | 5.09 | 5.92  |
|       | PZA01313.2             | 10 | 3598262   | 8.57 | 16.19 |
|       | PZE-110051214          | 10 | 96268908  | 4.38 | 4.58  |
| Sanya | PZE-103026453          | 3  | 19255311  | 5.19 | 4.57  |
|       | SYN17581               | 3  | 174742209 | 5.40 | 9.52  |
|       | SYN2182                | 4  | 159047308 | 6.10 | 14.41 |
|       | PZE-104086560          | 4  | 160131973 | 5.17 | 7.57  |
|       | PZE-104132625          | 4  | 221598254 | 5.17 | 9.64  |
|       | PZE-107050482          | 7  | 94446621  | 5.90 | 16.81 |

---

|         |                        |    |           |      |       |
|---------|------------------------|----|-----------|------|-------|
| Zhangye | PZE-109021971          | 9  | 22099758  | 5.35 | 6.71  |
|         | PZE-101161688          | 1  | 204081525 | 4.32 | 6.56  |
|         | PZB01979.2             | 1  | 224421551 | 6.12 | 7.85  |
|         | PZE-101124789          | 1  | 157170910 | 5.61 | 5.74  |
|         | PZE-102170743          | 2  | 213992430 | 4.55 | 10.83 |
|         | SYN4868                | 3  | 227812313 | 4.86 | 7.92  |
|         | PZE-103032119          | 3  | 24390862  | 4.14 | 3.71  |
|         | SYN21465               | 4  | 184629742 | 8.75 | 17.38 |
|         | SYN24008               | 4  | 241827929 | 4.46 | 6.16  |
|         | SYNGENTA10922          | 6  | 156740334 | 5.16 | 6.06  |
| LN      | SYN34204               | 7  | 145631181 | 5.07 | 8.18  |
|         | SYN32385               | 7  | 129793852 | 5.24 | 5.41  |
|         | PZA03543.3             | 8  | 107830603 | 5.21 | 5.59  |
|         | SYN13997               | 10 | 10158769  | 3.96 | 8.31  |
|         | PZE-110026998          | 10 | 44812890  | 3.89 | 4.40  |
|         | PZE-110010880          | 10 | 9080966   | 4.61 | 4.35  |
|         | PZE-110038968          | 10 | 74737641  | 4.28 | 4.91  |
|         | PZE-101197298          | 1  | 244831238 | 6.35 | 7.93  |
|         | PZE-101005806          | 1  | 4452918   | 4.26 | 6.40  |
|         | SYNGENTA16007          | 1  | 60158566  | 5.03 | 6.63  |
| Guiyang | PUT-163a-78121249-4396 | 3  | 141912418 | 4.48 | 5.34  |

---

|       |               |    |           |      |       |
|-------|---------------|----|-----------|------|-------|
|       | PZE-104053856 | 4  | 93692770  | 6.58 | 9.03  |
|       | PZE-104132437 | 4  | 221197797 | 5.11 | 5.75  |
|       | SYN33594      | 5  | 162869078 | 8.05 | 15.80 |
|       | PZE-106074560 | 6  | 130227960 | 5.92 | 8.74  |
|       | SYN34204      | 7  | 145631181 | 3.89 | 2.21  |
|       | PZE-107025209 | 7  | 29607900  | 5.23 | 8.82  |
|       | SYN7980       | 8  | 137481079 | 5.75 | 15.21 |
|       | SYN17572      | 8  | 21183591  | 5.49 | 5.21  |
|       | SYN37324      | 9  | 1038593   | 5.05 | 4.57  |
|       | PZE-109029505 | 9  | 32329732  | 3.72 | 5.49  |
|       | PZE-110063766 | 10 | 118814841 | 4.43 | 9.46  |
|       | PZE-110026005 | 10 | 42521152  | 6.13 | 6.93  |
| Sanya | SYN3043       | 3  | 148155393 | 5.23 | 3.75  |
|       | PZE-105096177 | 5  | 140706333 | 7.38 | 5.29  |
|       | PZE-105068275 | 5  | 70167652  | 4.92 | 4.84  |
|       | ZM013186-0134 | 9  | 145603981 | 5.52 | 17.53 |
|       | PZE-110033620 | 10 | 63293673  | 5.06 | 19.21 |
|       | PZE-110052027 | 10 | 98138896  | 7.02 | 9.48  |
|       | SYN12162      | 10 | 43110396  | 7.54 | 12.22 |

---

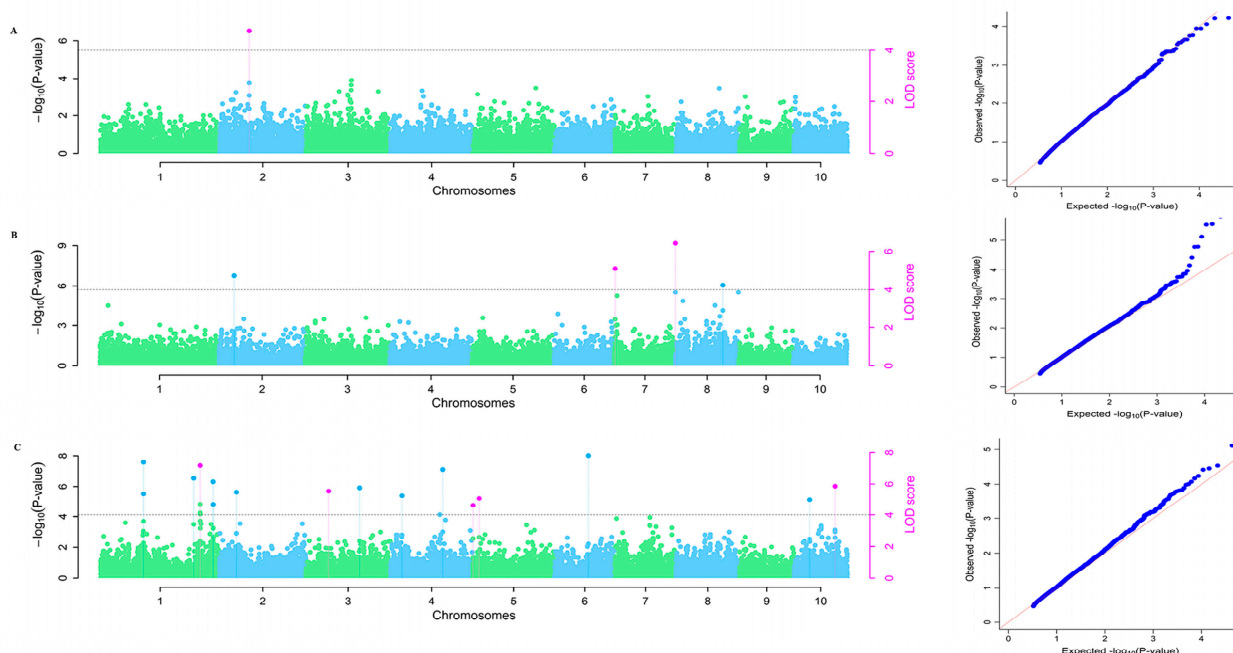

**Figure S1.** Manhattan and QQ plots for maize ear height under different environments. A was Guiyang, B was Zhangye, C was Sanya. a significance LOD score level was more than 3.0; Left plots were Manhattan, right plots were quantile-quantile (Q-Q).

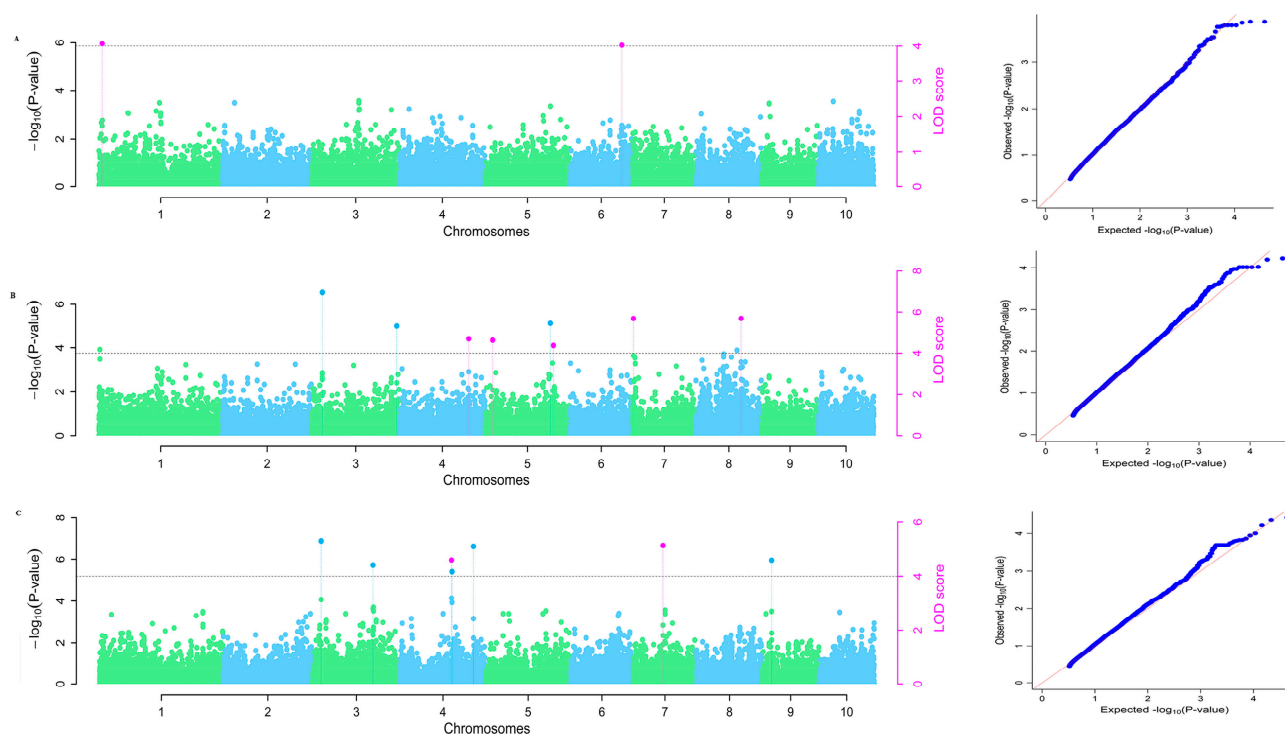

**Figure S2.** Manhattan and Q-Q plots for maize leaf number under different environments. A was Guiyang, B was Zhangye, C was Sanya. a significance LOD score level was more than 3.0; Left plots were Manhattan, right plots were quantile-quantile (Q-Q).
